# Supplementary material for: Antibody Immunological Imprinting on COVID-19 Patients
Source: bioRxiv or medRxiv preprint supplement (doi:10.1101/2020.10.14.20212662), 2020-10-20
Supplement: Supplementary file [file media-1.pdf]

Supplementary

**Antibody Immunological Imprinting on COVID-19 Patients**

Aydillo T<sup>1, 2</sup>, Alexander Rombauts<sup>3, 4</sup>, Daniel Stadlbauer<sup>1</sup>, Sadaf Aslam<sup>1,2</sup>, Gabriela Abelenda-Alonso<sup>3,4</sup>, Alba Escalera<sup>1,2</sup>, Fatima Amanat<sup>1,5</sup>, Kaijun Jiang<sup>1</sup>, Florian Krammer<sup>1\*</sup>, Jordi Carratala<sup>3,4\*</sup>, Adolfo García-Sastre<sup>1,2,6,7\*</sup>

Correspondence to: [adolfo.garcia-sastre@mssm.edu](mailto:adolfo.garcia-sastre@mssm.edu); [jcarratala@bellvitgehospital.cat](mailto:jcarratala@bellvitgehospital.cat);  
[florian.krammer@mssm.edu](mailto:florian.krammer@mssm.edu)

**Fig. S1.** Fold induction of anti- human seasonal coronaviruses antibodies over time. A) Boxplot diagram of fold induction values of ELISA AUC titers against HKU1, OC43 and 223E at each time point: HKU1 IgG spike, HKU1 IgG S1, OC43 IgG spike and 223E IgG spike; and OC43 hemagglutination titers. Related-samples Friedman's two-way comparison was performed and significant adjusted p values for pairwise comparisons are shown for each antibody levels at each time point. Black bar indicated median values, box indicates IQR (Q1-Q3), lines indicate minimum and maximum. Outliers from the observed distribution are shown when present in each case.

**Fig S2.** Influence of levels of back-boosting to HKU1 and OC43 normalized by levels of anti- SARS-CoV-2 on the induction of the novo neutralizing antibodies. A-D) Scatterplot of baseline and day 3 IgG levels for HKU1 and OC43 S protein normalized by the levels of SARS-CoV-2 IgG and their relationships with fold induction of SARS-CoV-2 neutralizing antibodies (nAb) over time. Overlay shows linear regression at each time point. Fitted linear regression and standardized beta coefficient (95% Confidence Interval, CI) for significant regression are shown.
